# Supplementary material for: Genetic variants within the cancer susceptibility region 8q24 and ovarian cancer risk in Han Chinese women
Source: PubMed Central journal article supplement (PMC5482668; doi:10.18632/oncotarget.16861), 2017-04-05
Supplement: oncotarget-08-36462-s001.pdf [file oncotarget-08-36462-s001.pdf]

## Genetic variants within the cancer susceptibility region 8q24 and ovarian cancer risk in Han Chinese women

### Supplementary Materials

**Supplementary Table 1: Information of primers and probes for TaqMan allelic discrimination assay**

| Variants   |        | Sequence (5'-3')                                          |
|------------|--------|-----------------------------------------------------------|
| rs13281615 | Primer | F:TAATGGAGAAGCACTATCCTGG<br>R:GCAGCAGATAGGAGGAATCAC       |
|            | Probe  | A: CATCAAAAGAAAGCAGAACGCAGA<br>G: CATCAAAAGAAGGCAGAACGCAG |
| rs6983267  | Primer | F:CGAATAAACTCTCCTCCTACCAC<br>R:GGTTCCTGCCCTTTGATTC        |
|            | Probe  | C: CTCAGTGCCTTTCA<br>A: CTCAGTGACTIONTCAT                 |

**Supplementary Table 2: Stratified analysis of the association between rs13281615 and ovarian cancer risk**

| Variables                | Case       |             |            | Control     |             |             | OR (95% CI) <sup>a</sup> | P <sup>a</sup> | P <sup>b</sup> |
|--------------------------|------------|-------------|------------|-------------|-------------|-------------|--------------------------|----------------|----------------|
|                          | AA (%)     | AG (%)      | GG (%)     | AA (%)      | AG (%)      | GG (%)      |                          |                |                |
| Age, year                |            |             |            |             |             |             |                          |                |                |
| < 52                     | 39 (22.41) | 89 (51.15)  | 46 (26.44) | 135 (26.57) | 249 (49.02) | 124 (24.41) | 0.94 (0.72–1.22)         | 0.638          | 0.496          |
| ≥ 52                     | 47 (23.62) | 103 (51.76) | 49 (24.62) | 144 (27.38) | 254 (48.29) | 128 (24.33) | 1.07 (0.82–1.39)         | 0.642          |                |
| Age at menarche, year    |            |             |            |             |             |             |                          |                |                |
| < 15                     | 42 (24.85) | 85 (50.30)  | 42 (24.85) | 52 (23.21)  | 118 (52.68) | 54 (24.11)  | 1.12 (0.88–1.43)         | 0.362          | 0.162          |
| ≥ 15                     | 40 (21.86) | 94 (51.37)  | 49 (26.78) | 225 (27.88) | 384 (47.58) | 198 (24.54) | 0.84 (0.61–1.16)         | 0.293          |                |
| Abortion                 |            |             |            |             |             |             |                          |                |                |
| Yes                      | 37 (24.34) | 82 (53.95)  | 33 (21.71) | 66 (25.68)  | 120 (46.69) | 71 (27.63)  | 0.93 (0.69–1.26)         | 0.637          | 0.469          |
| No                       | 46 (22.89) | 99 (49.25)  | 56 (27.86) | 194 (28.28) | 332 (48.40) | 160 (23.32) | 1.07 (0.85–1.35)         | 0.578          |                |
| Menopausal status        |            |             |            |             |             |             |                          |                |                |
| Premenopausal            | 28 (22.40) | 69 (55.20)  | 28 (22.40) | 129 (27.74) | 237 (50.97) | 99 (21.29)  | 1.02 (0.75–1.38)         | 0.904          | 0.960          |
| Postmenopausal           | 53 (23.98) | 108 (48.87) | 60 (27.15) | 140 (25.64) | 258 (47.25) | 148 (27.11) | 1.01 (0.80–1.27)         | 0.962          |                |
| Occupation               |            |             |            |             |             |             |                          |                |                |
| Farmer                   | 33 (21.43) | 82 (53.25)  | 39 (25.32) | 103 (26.68) | 193 (50.00) | 90 (23.32)  | 1.17 (0.87–1.57)         | 0.303          | 0.373          |
| Worker                   | 11 (19.64) | 28 (50.00)  | 17 (30.36) | 52 (31.14)  | 79 (47.31)  | 36 (21.56)  | 1.02 (0.59–1.78)         | 0.941          |                |
| Other                    | 42 (25.77) | 82 (50.31)  | 39 (23.93) | 24 (25.78)  | 231 (48.02) | 126 (26.20) | 0.87 (0.65–1.16)         | 0.345          |                |
| Oral contraceptive       |            |             |            |             |             |             |                          |                |                |
| Yes                      | 43 (20.48) | 110 (52.38) | 57 (27.14) | 223 (28.12) | 384 (48.42) | 186 (23.46) | 1.14 (0.91–1.43)         | 0.257          | 0.103          |
| No                       | 41 (27.70) | 73 (49.32)  | 34 (22.97) | 50 (23.15)  | 104 (48.15) | 62 (28.70)  | 0.82 (0.59–1.13)         | 0.226          |                |
| Family history of cancer |            |             |            |             |             |             |                          |                |                |
| Yes                      | 13 (20.31) | 37 (57.81)  | 14 (21.88) | 45 (23.68)  | 98 (51.58)  | 47 (24.74)  | 0.86 (0.47–1.56)         | 0.620          | 0.481          |
| No                       | 69 (23.63) | 143 (48.97) | 80 (27.40) | 230 (28.01) | 392 (47.75) | 199 (24.24) | 1.08 (0.88–1.32)         | 0.481          |                |

<sup>a</sup>Adjusted for age, age at menarche, abortion, menopausal status, and oral contraceptive where appropriate in additive models.

<sup>b</sup>P for heterogeneity test.
